# Supplementary material for: The Development and Consumer Acceptance of Functional Fruit-Herbal Beverages
Source: PubMed Central journal article supplement (PMC7762522; doi:10.3390/foods9121819), 2020-12-08
Supplement: foods-09-01819-s001.pdf [file foods-09-01819-s001.pdf]

Table S1: F-test values of analysis of physicochemical characteristic of fruit-herbal functional beverages presented in Table 2

| Type of beverage  | Vitamin C |                         | Carotenoids |                        | Polyphenols |                        | Anthocyanins |                          | Antioxidant capacity |                         |      |                         |      |                        |  |
|-------------------|-----------|-------------------------|-------------|------------------------|-------------|------------------------|--------------|--------------------------|----------------------|-------------------------|------|-------------------------|------|------------------------|--|
|                   |           |                         |             |                        |             |                        |              |                          | ABTS                 |                         | DPPH |                         | ORAC |                        |  |
|                   | O         | P                       | O           | P                      | O           | P                      | O            | P                        | O                    | P                       | O    | P                       | O    | P                      |  |
| Aronia            | T         |                         |             |                        |             |                        |              |                          |                      |                         |      |                         |      |                        |  |
|                   | D         | -                       |             | -                      |             | $F_{0.05}(1,8) = 0.04$ |              | $F_{0.05}(1,4) = 145.79$ |                      | $F_{0.05}(1,8) = 20.62$ |      | $F_{0.05}(1,8) = 31.65$ |      | $F_{0.05}(1,8) = 5.62$ |  |
| Rosehip - acerola | T         |                         |             |                        |             |                        |              |                          |                      |                         |      |                         |      |                        |  |
|                   | D         | $F_{0.05}(1,4) = 17.00$ |             | $F_{0.05}(1,4) = 0.52$ |             | $F_{0.05}(1,8) = 0.55$ |              | -                        |                      | $F_{0.05}(1,8) = 5.34$  |      | $F_{0.05}(1,8) = 31.56$ |      | $F_{0.05}(1,8) = 6.68$ |  |
| Cranberry         | T         |                         |             |                        |             |                        |              |                          |                      |                         |      |                         |      |                        |  |
|                   | D         | -                       |             | -                      |             | $F_{0.05}(1,8) = 5.41$ |              | $F_{0.05}(1,4) = 70.74$  |                      | $F_{0.05}(1,8) = 8.24$  |      | $F_{0.05}(1,8) = 8.65$  |      | $F_{0.05}(1,8) = 6.16$ |  |
| Sea buckthorn     | T         |                         |             |                        |             |                        |              |                          |                      |                         |      |                         |      |                        |  |
|                   | D         | $F_{0.05}(1,4) = 37.00$ |             | $F_{0.05}(1,4) = 9.31$ |             | $F_{0.05}(1,8) = 2.08$ |              | -                        |                      | $F_{0.05}(1,8) = 6.15$  |      | $F_{0.05}(1,8) = 6.17$  |      | $F_{0.05}(1,8) = 9.00$ |  |
